# Supplementary material for: Water Safety Plan, Monochloramine Disinfection and Extensive Environmental Sampling Effectively Control Legionella and Other Waterborne Pathogens in Nosocomial Settings: The Ten-Year Experience of an Italian Hospital
Source: MDPI journal article supplement (doi:10.3390/microorganisms11071794), 2023-07-13
Supplement: s1 [file s1]

## SUPPLEMENTARY

**Table S1:** Physical-chemical properties of municipal drinking water supplied to the Hospital (adapted from data published by water supplier).

| Parameter         | Value | Reference value | Unit    |
|-------------------|-------|-----------------|---------|
| pH                | 7.9   | 6.5-9.5         | pH unit |
| Dissolved solids  | 209   | 1500            | mg/L    |
| Total hardness    | 18    | 15-50           | °F      |
| Conductivity 20°C | 298   | 2500            | μS/cm   |
| Calcium           | 47.8  |                 | mg/L    |
| Magnesium         | 14.0  |                 | mg/L    |
| Ammonia           | < 0.1 | 0.5             | mg/L    |
| Chloride          | 3     | 250             | mg/L    |
| Sulfate           | 20    | 250             | mg/L    |
| Potassium         | < 0.5 |                 | mg/L    |
| Sodium            | 2     | 200             | mg/L    |
| Arsenic           | <1    | 200             | mg/L    |
| Bicarbonate       | 178   |                 | mg/L    |
| Free chlorine     | < 0.1 | 0.2             | mg/L    |
| Fluoride          | <0.05 | 1.5             | mg/L    |
| Nitrate           | 4     | 50              | mg/L    |
| Nitrite           | <0.05 | 0.5             | mg/L    |
| Manganese         | <5    | 50              | μg/L    |

**Table S2:** Domestic hot water consumption. For each domestic hot water production unit, mean value of the water monthly consumed is reported, together with relative standard deviation.

| Domestic hot water production unit | Water consumption/month |
|------------------------------------|-------------------------|
| T1                                 | 134±2 m <sup>3</sup>    |
| T2                                 | 114±6 m <sup>3</sup>    |
| T3                                 | 98±14 m <sup>3</sup>    |
| T4                                 | 128±21 m <sup>3</sup>   |
| T5                                 | 118±15 m <sup>3</sup>   |
| T6                                 | 133±31 m <sup>3</sup>   |
| T7                                 | 99±12 m <sup>3</sup>    |
| SO                                 | 43±21 m <sup>3</sup>    |
| M1                                 | 171±62 m <sup>3</sup>   |
| M2                                 | 189±99 m <sup>3</sup>   |
